# Supplementary material for: Microwave-Promoted Total Synthesis of Puniceloid D for Modulating the Liver X Receptor
Source: MDPI journal article supplement (doi:10.3390/molecules29020416), 2024-01-15
Supplement: s1 [file s1]

# **Microwave-Promoted Total Synthesis of Puniceloid D for Modulating the Liver X Receptor**

Young Jin Jung <sup>1,†</sup>, Narges Hosseininassab <sup>2,†</sup>, Jungjin Park <sup>2</sup>, Soonsil Hyun <sup>2</sup>, Jae-Kyung Jung <sup>2</sup> and Jae-Hwan Kwak <sup>1,2,\*</sup>

<sup>1</sup> College of Pharmacy, Kyungshung University, Busan, 48434, Republic of Korea; louisj0750@naver.com

<sup>2</sup> College of Pharmacy, Chungbuk National University, Cheongju, 28160, Republic of Korea; nargeshosseini@chungbuk.ac.kr, jjpark0823@chungbuk.ac.kr, shyun@chungbuk.ac.kr, orgjkjung@chungbuk.ac.kr

\* Correspondence: jhkwak@chungbuk.ac.kr; Tel.: +82-43-261-2997

<sup>†</sup> These authors contributed equally to this work.

## Supporting information

### Supporting Figure captions:

**Figure S1:**  $^1\text{H}$  NMR Spectrum of 7

**Figure S2:**  $^{13}\text{C}$  NMR Spectrum of 7

**Figure S3:**  $^1\text{H}$  NMR Spectrum of 6

**Figure S4:**  $^{13}\text{C}$  NMR Spectrum of 6

**Figure S5:**  $^1\text{H}$  NMR Spectrum of 5

**Figure S6:**  $^{13}\text{C}$  NMR Spectrum of 5

**Figure S7:**  $^1\text{H}$  NMR Spectrum of 4

**Figure S8:**  $^{13}\text{C}$  NMR Spectrum of 4

**Figure S9:**  $^1\text{H}$  NMR Spectrum of 3

**Figure S10:**  $^{13}\text{C}$  NMR Spectrum of 3

**Figure S11:**  $^1\text{H}$  NMR Spectrum of 2

**Figure S12:**  $^{13}\text{C}$  NMR Spectrum of 2

**Figure S13:**  $^1\text{H}$  NMR Spectrum of 1

**Figure S14:**  $^{13}\text{C}$  NMR Spectrum of 1

**Figure S15:** Comparative NMR Data of 1 (A) and the reported one (B)

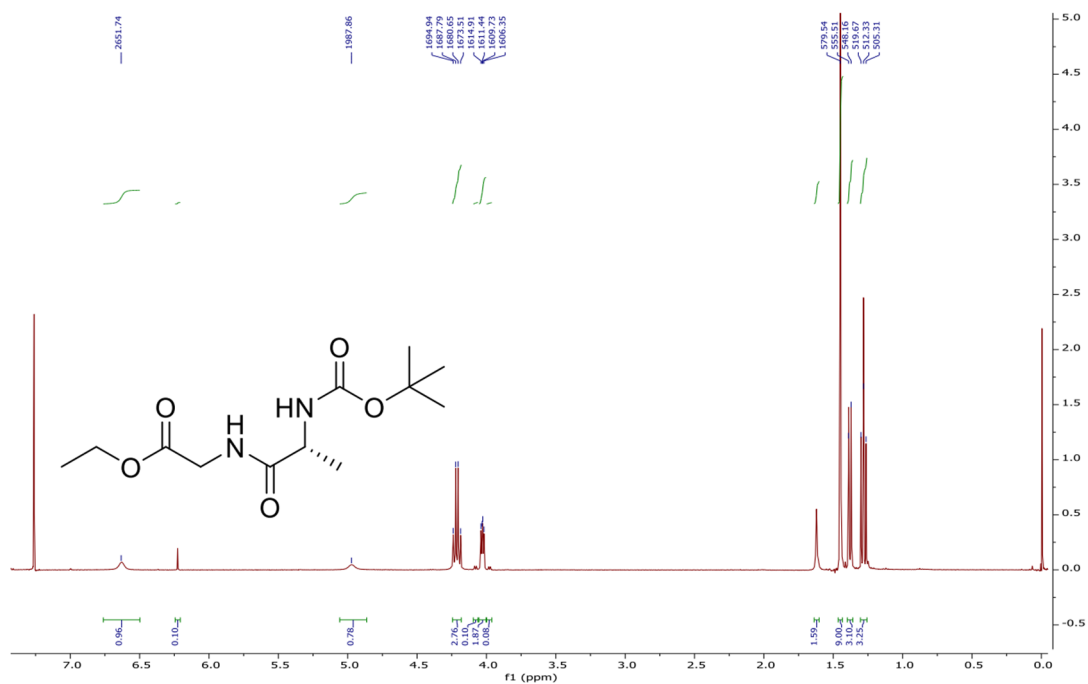

Figure S1

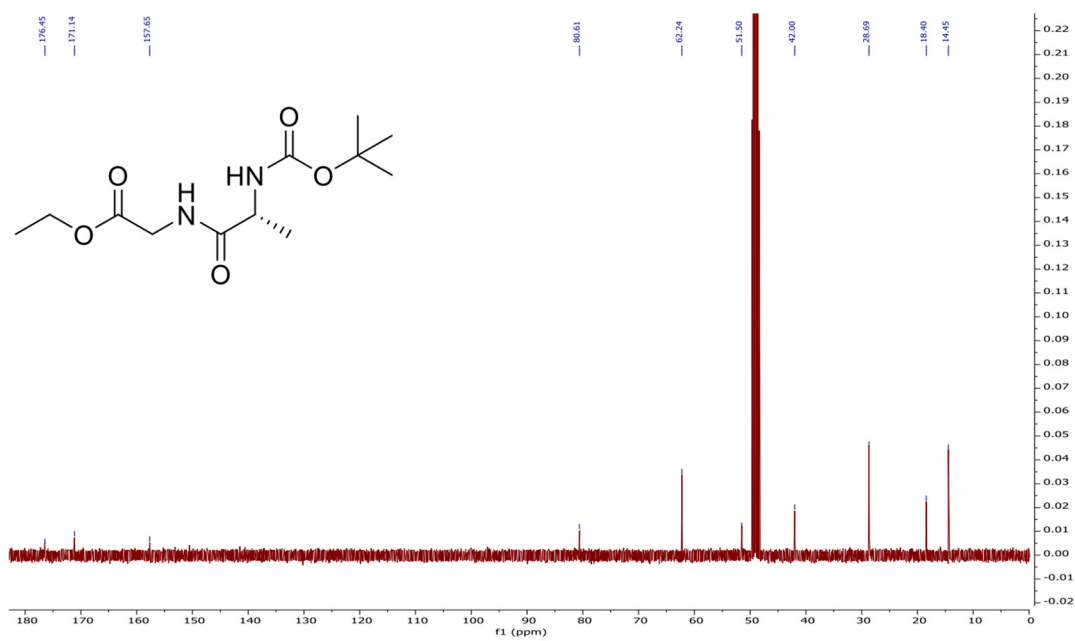

Figure S2

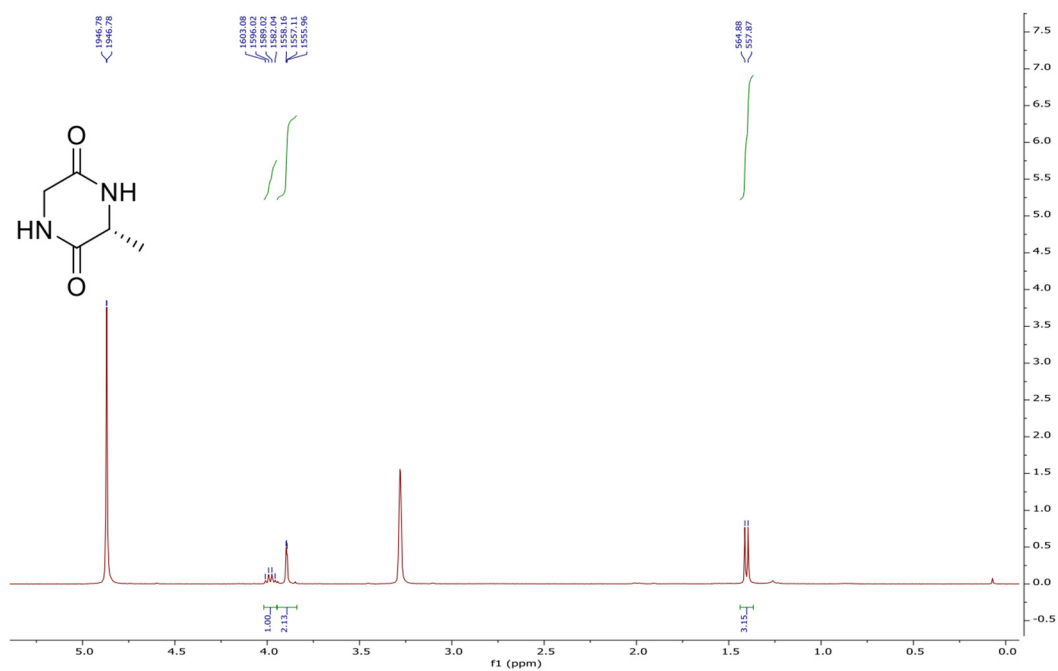

Figure S3

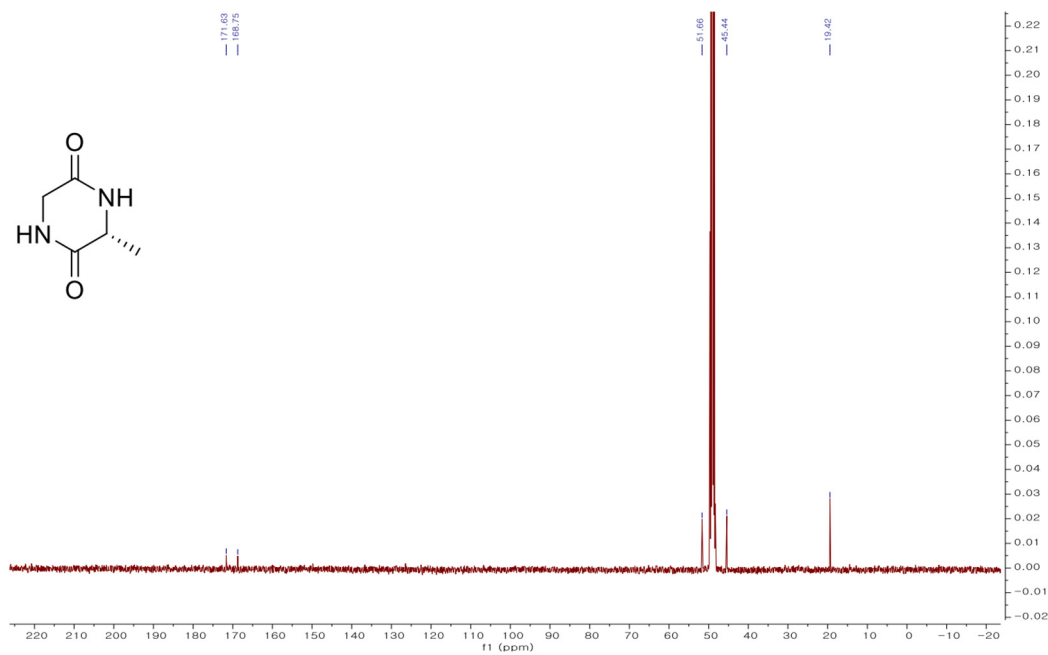

Figure S4





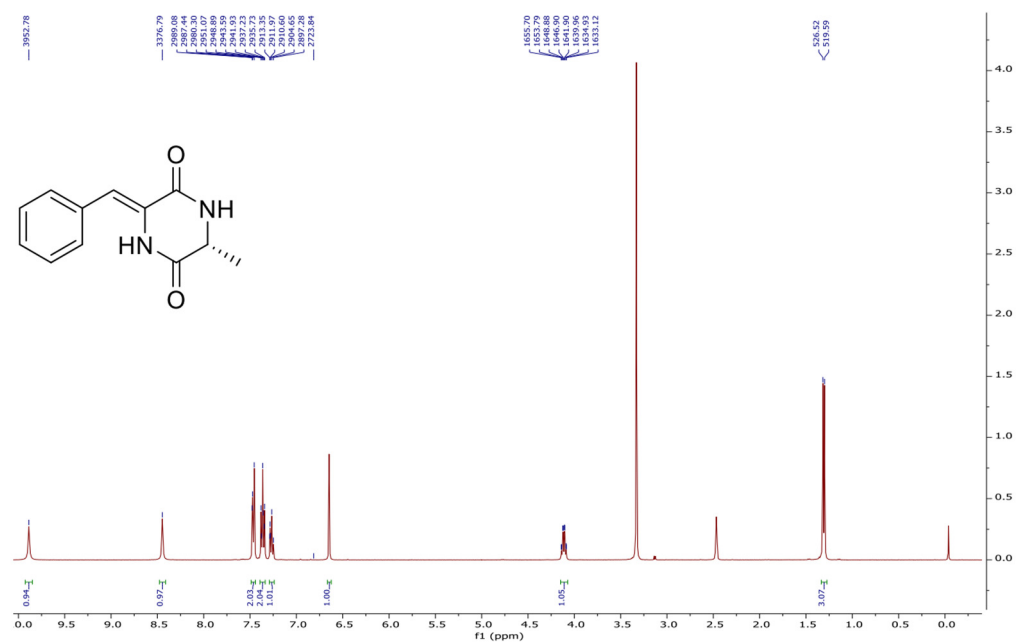

Figure S9

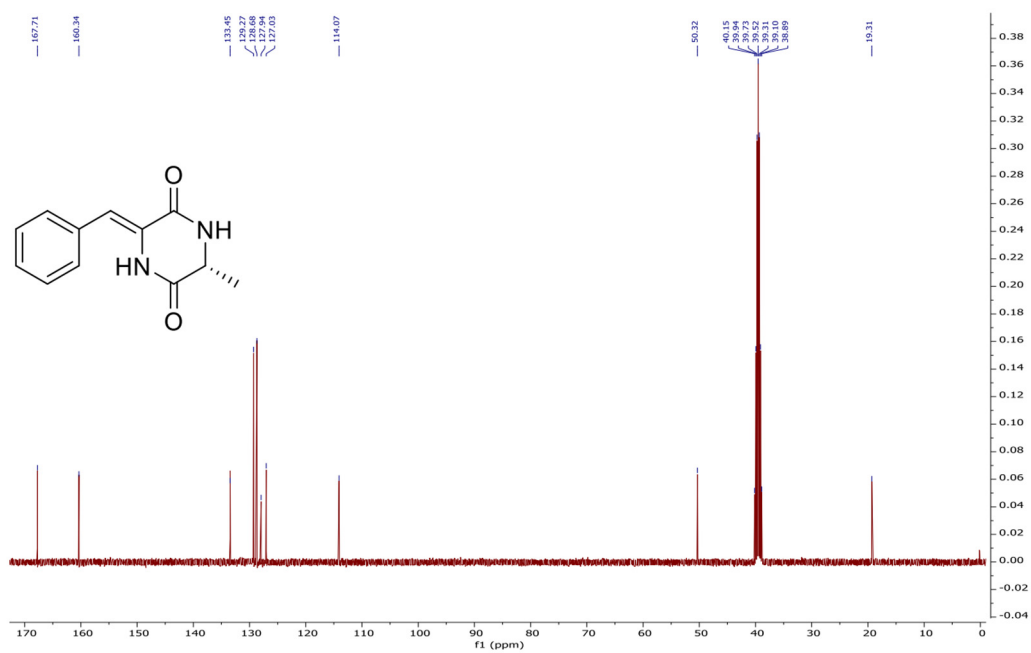

Figure S10

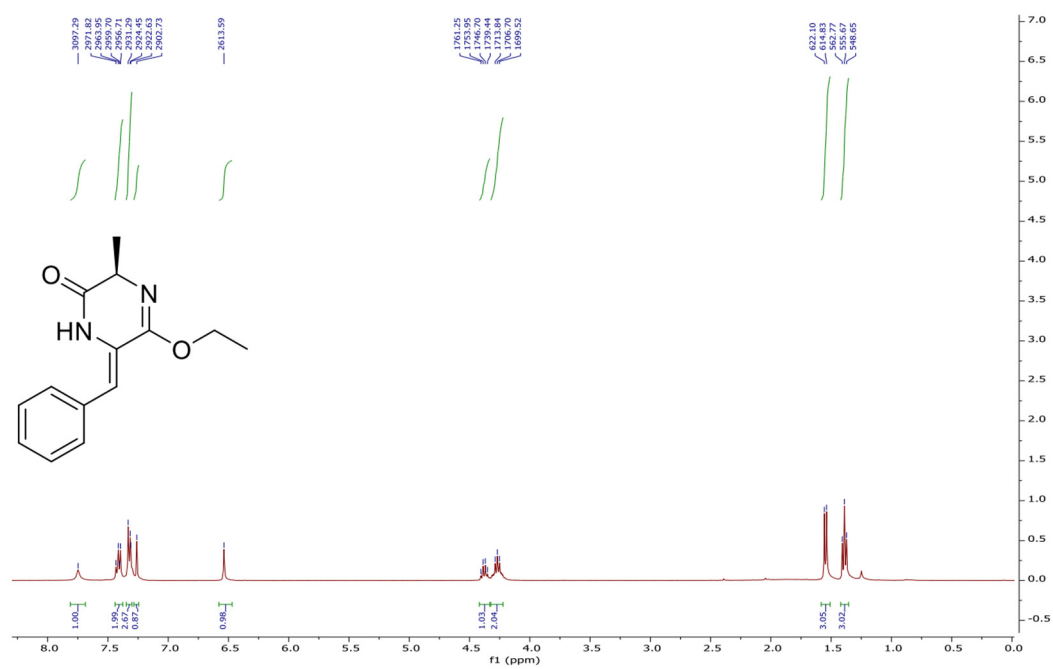

Figure S11

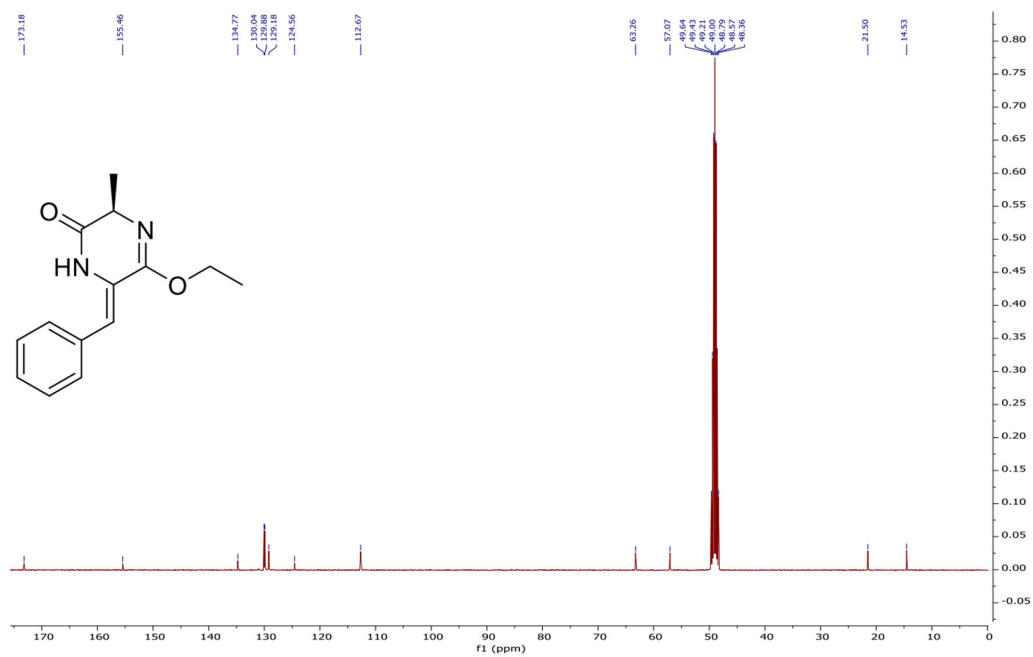

Figure S12



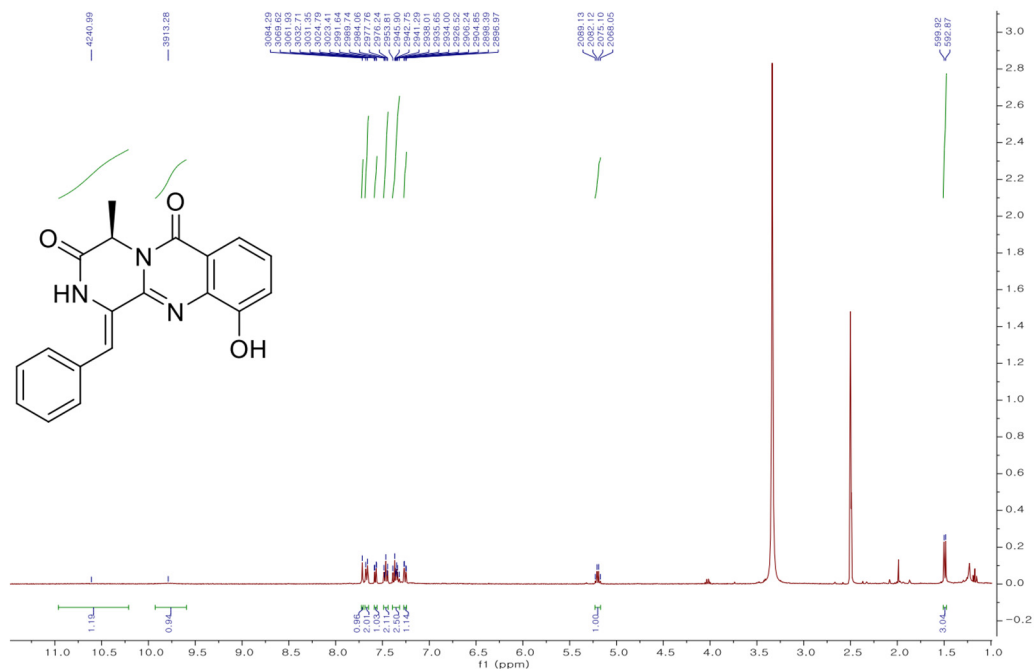

**Figure S13**

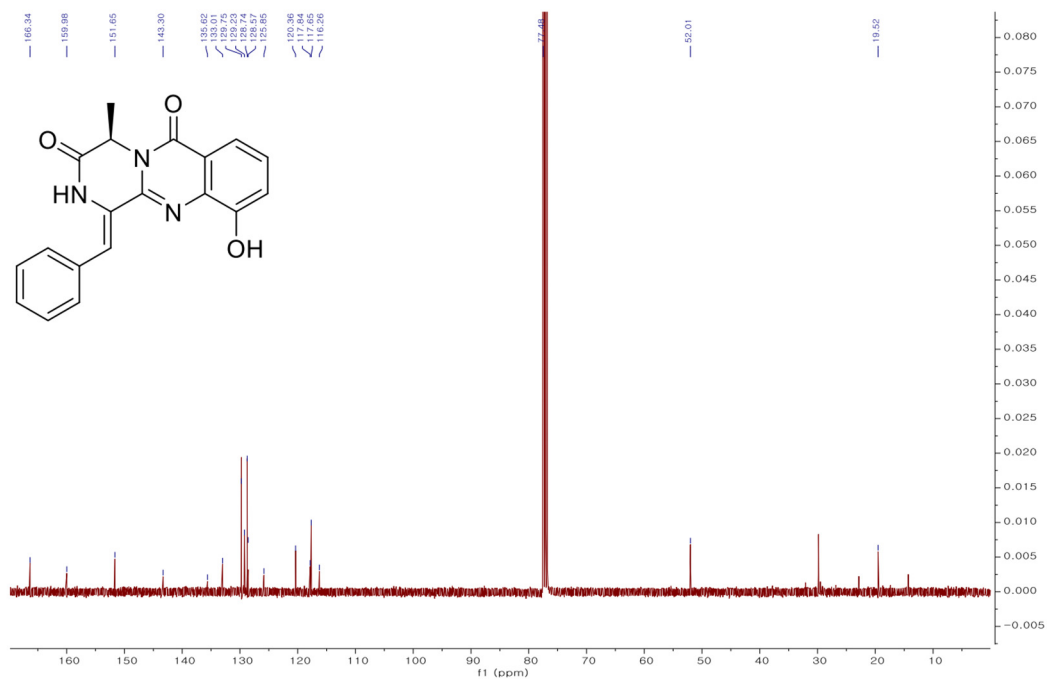

**Figure S14**

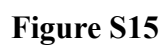

**Figure S15**
